# Supplementary material for: CAMDLES: CFD-DEM Simulation of Microbial Communities in Spaceflight and Artificial Microgravity
Source: MDPI journal article supplement (doi:10.3390/life12050660), 2022-04-29
Supplement: s1 [file s1]

**Table S1: Physical, Chemical, and Biological Parameters.** Default simulation parameters are used in all simulations unless otherwise stated.

| Parameter                             | Symbol   | Value            | Units                               | Description                                                                                    | Ref. |
|---------------------------------------|----------|------------------|-------------------------------------|------------------------------------------------------------------------------------------------|------|
| <b>Simulation Physical Properties</b> |          |                  |                                     |                                                                                                |      |
| Simulation Dimensions                 |          | 300 x 100 x 300  | $\mu\text{m}$                       | Radial and azimuthal periodic boundary conditions. Zero-gradient boundary conditions elsewhere |      |
| Parcel Dimensions                     |          | 5 x 20 x 5       | $\mu\text{m}$                       | Fluid parcel size                                                                              |      |
| Simulation Volume                     | $V$      | $9 (10)^6$       | $\mu\text{m}^3$                     |                                                                                                |      |
| Simulation Radius from HARV           | $r$      | $(10)^5$         | $\mu\text{m}$                       | Maximum distance of simulation box to radius of rotation                                       |      |
| Fluid Density                         | $\rho_f$ | 1.00             | $\frac{\text{pg}}{\mu\text{m}^3}$   | Density of media                                                                               | [54] |
| Fluid Kinematic Viscosity             | $\nu$    | 0.9              | $\frac{\mu\text{m}^2}{\mu\text{s}}$ | Constant viscosity of media                                                                    | [54] |
| HARV Rotation Rate                    |          | 10               | R.P.M.                              |                                                                                                |      |
| Gravitational Field Strength          | $g$      | $9.81 (10)^{-6}$ | $\frac{\text{pg}}{\mu\text{s}^2}$   |                                                                                                |      |
| <b>Integration</b>                    |          |                  |                                     |                                                                                                |      |
| <b>Timesteps:</b>                     |          |                  | $\mu\text{s}$                       |                                                                                                |      |
| Particle Timestep                     | $dt$     | 150-250          | $\mu\text{s}$                       |                                                                                                |      |
| Fluid Timestep                        | $dt$     | 150-250          | $\mu\text{s}$                       |                                                                                                |      |
| Chemical Timestep                     | $dt$     | 150-250          | $\mu\text{s}$                       | Higher diffusion requires a smaller timestep                                                   |      |
| Biological Timestep                   | $dt$     | 150-250          | $\mu\text{s}$                       |                                                                                                |      |
| Temperature                           | $T$      | 310.15           | K                                   | Constant                                                                                       | [20] |

## Simulation Chemical Properties

|                                                    |           |                                                                                                 |                                     |                                                                                                                                                |          |
|----------------------------------------------------|-----------|-------------------------------------------------------------------------------------------------|-------------------------------------|------------------------------------------------------------------------------------------------------------------------------------------------|----------|
| Mass Transfer Coefficient                          | $h_s$     | variable                                                                                        | $\frac{\mu\text{m}}{\mu\text{s}}$   |                                                                                                                                                |          |
| Methionine Diffusivity                             | $D_{e,m}$ | Low: 3.1 (10) <sup>-4</sup><br>Mid: 5.0 (10) <sup>-4</sup><br>High: 7.6 (10) <sup>-4</sup>      | $\frac{\mu\text{m}^2}{\mu\text{s}}$ | Fick's Law diffusion constant                                                                                                                  | [51, 55] |
| Acetate Diffusivity                                | $D_{e,a}$ | Low: 4.9 (10) <sup>-4</sup><br>Mid: 5.0 (10) <sup>-4</sup><br>High: 12. (10) <sup>-4</sup><br>4 | $\frac{\mu\text{m}^2}{\mu\text{s}}$ | Fick's Law diffusion constant                                                                                                                  | [51, 55] |
| Bulk Media Diffusivity                             | $D_{e,l}$ | Low: 2.1 (10) <sup>-4</sup><br>Mid: 5.0 (10) <sup>-4</sup><br>High: 5.1 (10) <sup>-4</sup>      | $\frac{\mu\text{m}^2}{\mu\text{s}}$ | Fick's Law diffusion constant                                                                                                                  | [56]     |
| Starting Methionine Quantity                       |           | 0.00001/Y <sub>ES</sub>                                                                         | $\frac{\text{pg}}{\mu\text{m}^3}$   | To kickstart metabolism, total Simulation Starting Quantity Distributed Equally among all Cells, in terms of Biomass Equivalents of <i>E</i> . |          |
| Starting Acetate Quantity                          |           | 0.00001/Y <sub>SS</sub>                                                                         | $\frac{\text{pg}}{\mu\text{m}^3}$   | Starting Quantity in terms of Biomass Equivalents of <i>S</i> .                                                                                |          |
| Acetate Coefficient of Solutal Specific Gravity    | $\beta_1$ | 0.85                                                                                            |                                     | Linearly interpolated coefficient that converts acetate concentration (cell equivalent) to fluid density                                       | [57]     |
| Methionine Coefficient of Solutal Specific Gravity | $\beta_2$ | 0.003                                                                                           |                                     | Linearly interpolated coefficient that converts methionine concentration (cell equivalent) to fluid density                                    | [58]     |
| Bulk Media Coefficient of Solutal Specific Gravity | $\beta_3$ | 0.39                                                                                            |                                     | Linearly interpolated coefficient that converts lactose concentration (cell equivalent) to fluid density                                       | [59]     |

## Bacterial Cell Physical/Mechanical Properties

|           |     |      |    |                                                                         |  |
|-----------|-----|------|----|-------------------------------------------------------------------------|--|
| Cell size | $d$ | 1.12 | pg | Diameter, based on effective volume of a rod shaped <i>E. coli</i> [60] |  |
|-----------|-----|------|----|-------------------------------------------------------------------------|--|

|                               |          |        |                                              |                                                |      |
|-------------------------------|----------|--------|----------------------------------------------|------------------------------------------------|------|
| Cell Volumetric density       | $\rho_s$ | 1.08   | $\frac{\text{pg}}{\mu\text{m}^3}$            | Needed for Bouyancy                            | [60] |
| Young's Modulus of Elasticity | $E$      | 50,000 | $\frac{\text{pg}}{\mu\text{m}\mu\text{s}^2}$ | Required LIGGGHTS® parameter                   | [46] |
| Coefficient of Restitution    | $e$      | 0.05   |                                              | Minimum Required LIGGGHTS® collision parameter |      |
| Poisson Ratio                 | $\nu$    | 0.4    |                                              | Required LIGGGHTS® parameter                   | [46] |
| Surface Energy Intensity      | $\gamma$ | 0      | $\frac{\text{pg}}{\mu\text{s}^2}$            | Cell – cell Adhesion Energy                    |      |
| Coefficient of Friction       | $\mu_f$  | 0      |                                              | Cell – cell Sliding Friction Coefficient       |      |

#### *E. coli* Biological Properties

|                            |               |                   |                                      |                                                                   |          |
|----------------------------|---------------|-------------------|--------------------------------------|-------------------------------------------------------------------|----------|
| Population Density         |               | $1.11 (10)^{-10}$ | $\frac{\text{cells}}{\mu\text{m}^3}$ | Starting Density of Coculture                                     | [20]     |
| Maximal growth-rate        | $\mu_{max,E}$ | $1.82 (10)^{-11}$ | $\mu\text{s}^{-1}$                   | Monod Kinetic Maximal Growth Rate                                 | [29, 61] |
| Biomass Yield (Methionine) | $Y_{ES}$      | 70.2              | $\frac{\text{pg}}{\text{pg}}$        | Biomass/Methionine Mass                                           | [17, 48] |
| Biomass Yield (Lactose)    | $Y_{ES}$      | 1.5               | $\frac{\text{pg}}{\text{pg}}$        | Biomass/Lactose Mass                                              | [61, 62] |
| Product Yield              | $Y_{PS}$      | 31.9              | $\frac{\text{pg}}{\text{pg}}$        | Acetate/Methionine Mass                                           | [29, 63] |
| Half-saturation constant   | $K_S$         | variable          | $\frac{\text{pg}}{\mu\text{m}^3}$    | Monod Kinetic Substrate Concentration of Half-maximal Growth Rate | [48]     |

#### *S. enterica* Biological Properties

|                     |               |                   |                                      |                                   |      |
|---------------------|---------------|-------------------|--------------------------------------|-----------------------------------|------|
| Population Density  |               | $1.11 (10)^{-10}$ | $\frac{\text{cells}}{\mu\text{m}^3}$ | Starting Density of Coculture     | [20] |
| Maximal growth-rate | $\mu_{max,S}$ | $9.09 (10)^{-12}$ | $\mu\text{s}^{-1}$                   | Monod Kinetic Maximal Growth Rate | [61] |
| Biomass Yield       | $Y_{SS}$      |                   | $\frac{\text{pg}}{\text{pg}}$        | Biomass/Acetate Mass              | [61] |

|                                |          |                     |                                                   |                                                                        |
|--------------------------------|----------|---------------------|---------------------------------------------------|------------------------------------------------------------------------|
| 0.46                           |          |                     |                                                   |                                                                        |
| Product Yield                  | $Y_{PS}$ | 0.058               | $\frac{\text{pg}}{\text{pg}}$                     | Methionine/Acetate Mass [29, 61]                                       |
| Half-saturation constant       | $K_s$    | variable            | $\frac{\text{pg}}{\mu\text{m}^3}$                 | Monod Kinetic Substrate Concentration of Half Maximal Growth Rate [48] |
| <b>Non-dimensional Numbers</b> |          |                     |                                                   |                                                                        |
| Reynolds Number                | Re       | $\frac{u_f d}{\nu}$ | Ratio of Inertial to Viscous Forces               |                                                                        |
| Schmidt Number                 | Sc       | $\frac{\nu}{D_m}$   | Ratio of Momentum Diffusivity to Mass Diffusivity |                                                                        |
| Sherwood Number                | Sh       | $\frac{h}{D_m/d}$   | Ratio of Convective to Diffusive Mass Transport   |                                                                        |

**Table S2: Simulation Details and Results.** Simulation input files can be found in File S1.

5

| File Names                    | Spatial Structure & Diffusivity               | Population Size & E:S Ratio | Notes                        | Steady % Growth Rate |
|-------------------------------|-----------------------------------------------|-----------------------------|------------------------------|----------------------|
| 3.1.1a-c                      | Manually Placed, Intermediate Diffusion       | 2 cells, 1 E : 1 S          | 0.01_starting metabolites    |                      |
|                               |                                               |                             | a. (1 µm distance)           | 4.7                  |
|                               |                                               |                             | b. (50 µm distance)          | 4.6                  |
|                               |                                               |                             | c. (218 µm distance)         | 4.4                  |
| 3.1.1d, 3.1.1e/3.1.2a/3.1.3f  | Manually Placed, High Diffusion               | 3 cells, 2:1                | 0.00001_starting metabolites |                      |
|                               |                                               |                             | d. (207 µm distance)         | 0.8                  |
|                               |                                               |                             | e. (1 µm distance)           | 4.9                  |
| 3.1.2b-c,                     | Randomly Distributed High Diffusion           | b. 2000 cells               |                              | 27.2                 |
|                               |                                               | 1.86:1                      |                              |                      |
|                               |                                               | c. 283 cells                |                              |                      |
|                               |                                               | 1.86:1                      |                              | 29.4                 |
| 3.1.2c2, 3.1.2e               | Spherical gaussian distributed High Diffusion | C2. 283 cells               |                              |                      |
|                               |                                               | 1.86:1                      |                              | 27.8                 |
|                               |                                               | E. 100 cells                |                              |                      |
|                               |                                               | 1.86:1                      |                              | 24.5                 |
| 3.1.2d/3.1.3a/3.2.3e 3.1.3b-e | Tightly packed Sphere, High diffusion         | 1:86:1                      |                              |                      |
|                               |                                               | a. 2000 cells               |                              | 35.4                 |
|                               |                                               | b. 1000 cells               |                              | 29.3                 |
|                               |                                               | c. 500 cells                |                              | 28.8                 |
|                               |                                               | d. 283 cells                |                              |                      |
|                               |                                               | e. 99 cells                 |                              | 26                   |
|                               |                                               | f. See above                |                              | 23.4                 |

|                           |                                                                    |                              |                                                                                                                             |                           |
|---------------------------|--------------------------------------------------------------------|------------------------------|-----------------------------------------------------------------------------------------------------------------------------|---------------------------|
|                           |                                                                    | 1:86:1                       |                                                                                                                             | 29.4                      |
| 3.1.3g/3.2.3c<br>3.1.3h-l | Tightly packed<br>Sphere, Low diffusion                            | g. 2000<br>cells             |                                                                                                                             | 29.0                      |
|                           |                                                                    | h. 1000<br>cells             |                                                                                                                             | 28.6                      |
|                           |                                                                    | i. 500 cells                 |                                                                                                                             | 27.8                      |
|                           |                                                                    | j. 283 cells                 |                                                                                                                             |                           |
|                           |                                                                    | k. 99 cells                  |                                                                                                                             | 24.5                      |
|                           |                                                                    | l. 3 cells                   |                                                                                                                             |                           |
|                           |                                                                    |                              |                                                                                                                             | 6.6                       |
| <hr/>                     |                                                                    |                              |                                                                                                                             |                           |
| 3.1.4a/3.2.3a<br>3.1.4b   | Intermediate diffusion                                             | 2000<br>cells,<br>44 E : 1 S | 0.00000001 starting<br>metabolites<br>190% $\lambda_E$ and 333% $\lambda_S$<br>Measured S. Growth                           | 50                        |
|                           | a. Gaussian<br>Distributed<br>Sphere<br>b. Randomly<br>distributed |                              |                                                                                                                             | ~0                        |
| <hr/>                     |                                                                    |                              |                                                                                                                             |                           |
| 3.2.1/3.2.3b              |                                                                    |                              | Same conditions as 3.1.4a plus<br>RWV hydrodynamics                                                                         | 7.6                       |
| <hr/>                     |                                                                    |                              |                                                                                                                             |                           |
| 3.2.2a-b                  | Gaussian Spheres                                                   | 2000<br>cells,<br>18 E : 1 S | 0.00001 starting metabolites<br>190% $\lambda_E$ and 333% $\lambda_S$<br>Measured S. Growth<br>(218 $\mu\text{m}$ distance) | not steady<br>(Figure 8b) |
|                           | Distributed<br>Intermediate diffusion                              |                              | a. Microgravity<br>b. RWV                                                                                                   | not steady<br>(Figure 8b) |

---

|          |                                                                      |                                   |                                                                                                                                                |                                                  |
|----------|----------------------------------------------------------------------|-----------------------------------|------------------------------------------------------------------------------------------------------------------------------------------------|--------------------------------------------------|
| 3.2.3c-g | Tightly packed spheres,<br>c-e. Low Diffusion<br>f-g. High Diffusion | 2000<br>cells,<br>1.86 E : 1<br>S | b. RWV Liquid colony<br>c. RWV Solid colony<br>d. Microgravity<br>e. RWV Solid Colony<br>f. Microgravity<br>$\lambda_E$ and $\lambda_S$ varies | Growth depends on<br>product yield (Figure<br>9) |
|----------|----------------------------------------------------------------------|-----------------------------------|------------------------------------------------------------------------------------------------------------------------------------------------|--------------------------------------------------|

---

|          |                                                                                       |                              |            |                                 |
|----------|---------------------------------------------------------------------------------------|------------------------------|------------|---------------------------------|
| 3.3.1a-b | Intermediate Diffusion<br>a. Flat cylindrical<br>on floor<br>b. Spherical on<br>floor | 2000<br>cells,<br>44 E : 1 S | 1g Gravity | Not steady state<br>(Figure 8b) |
|----------|---------------------------------------------------------------------------------------|------------------------------|------------|---------------------------------|

---
